# Supplementary material for: The impact of perioperative red blood cell transfusions in patients undergoing liver resection: a systematic review protocol
Source: PubMed Central journal article supplement (PMC4770706; doi:10.1186/s13643-016-0217-5), 2016-02-29
Supplement: 13643_2016_217_MOESM2_ESM.pdf [file 13643_2016_217_MOESM2_ESM.pdf]

Database: Ovid MEDLINE(R) In-Process & Other Non-Indexed Citations and Ovid MEDLINE(R)  
<1946 to Present>

Search Strategy:

- 
- 1 exp Liver Neoplasms/su (20551)
  - 2 Hepatectomy/ (23248)
  - 3 hepatectom\*.tw. (17035)
  - 4 ((liver or hepatic or hepato\*) adj2 resect\*).tw. (14735)
  - 5 or/1-4 (44945)
  - 6 exp blood transfusion/ (85009)
  - 7 ((rbc or blood\$ or red cell\$ or erythrocyte\$ or plasma or platelet\$) adj2 transfusion\$).tw.  
(46072)
  - 8 transfusion\*.ti. (32101)
  - 9 cryoprecipitate.tw. (1736)
  - 10 or/6-9 (111774)
  - 11 5 and 10 (1280)
  - 12 remove duplicates from 11 (1264)
